# Supplementary material for: Modeling the Role of Lanthionine Synthetase C-Like 2 (LANCL2) in the Modulation of Immune Responses to Helicobacter pylori Infection
Source: PubMed Central journal article supplement (PMC5147901; doi:10.1371/journal.pone.0167440), 2016-12-09
Supplement: pone.0167440.s003.pdf [file pone.0167440.s003.pdf]

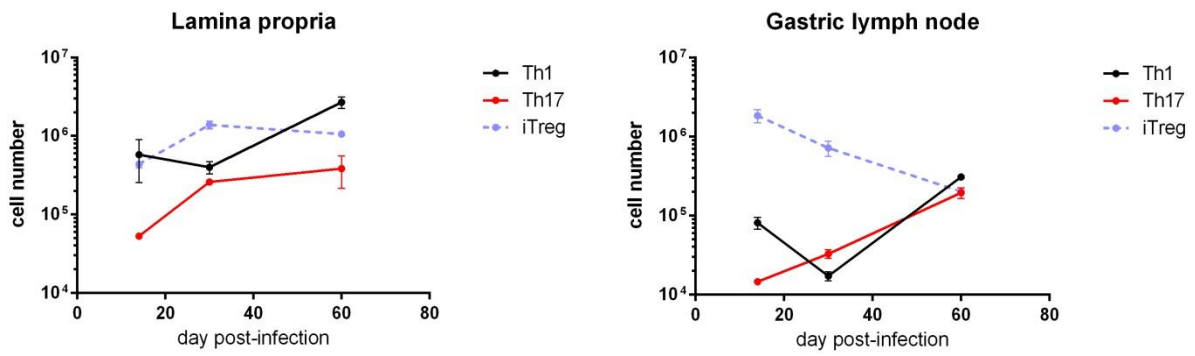

**Fig. S3. *In vivo* T cell responses to *H. pylori* infection.** Cell numbers of Th1 (CD4+CD3+Tbet+IFN $\gamma$ +), Th17 (CD4+CD3+ROR $\gamma$ T+IL17+) and iTreg (CD4+CD3+FOXP3+IL10+) in stomach lamina propria and gastric lymph node through time course of *H. pylori* (strain: SS1) infection in wild type mice.
