# Supplementary material for: Modeling the Role of Lanthionine Synthetase C-Like 2 (LANCL2) in the Modulation of Immune Responses to Helicobacter pylori Infection
Source: PubMed Central journal article supplement (PMC5147901; doi:10.1371/journal.pone.0167440), 2016-12-09
Supplement: pone.0167440.s004.pdf [file pone.0167440.s004.pdf]

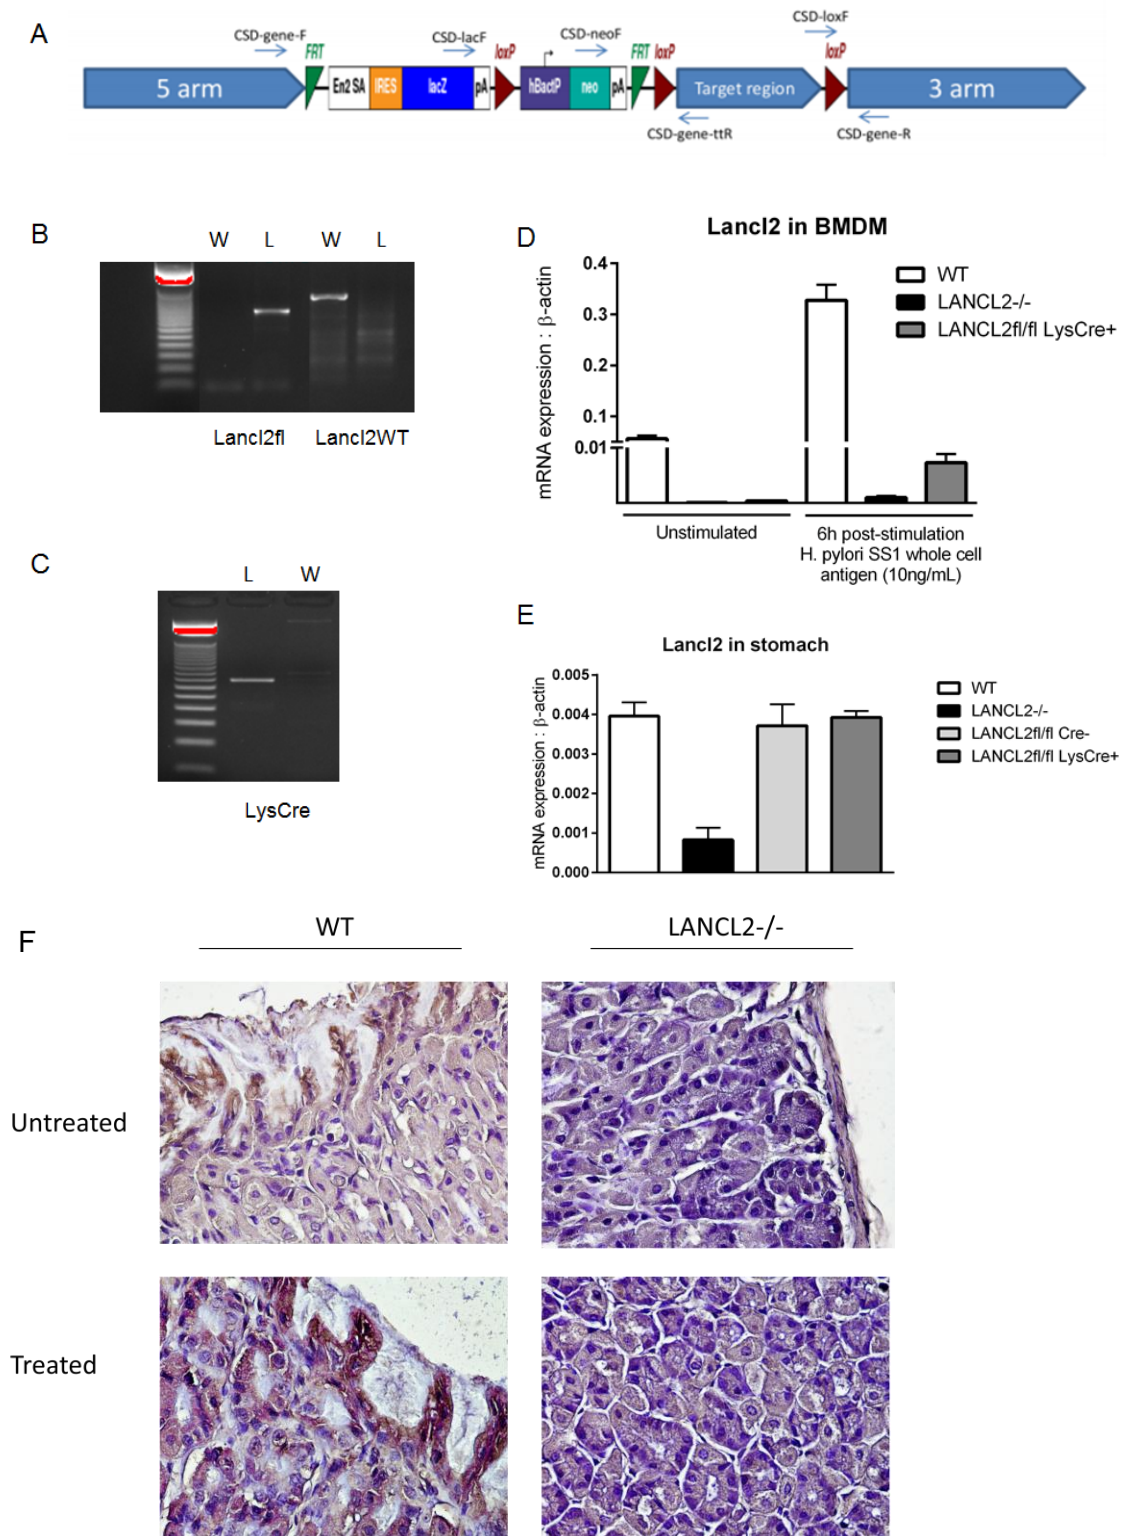

**Figure S4. Characterization of LANCL2 knockout mice.** Graphical scheme of genetic modification for knockout of LANCL2 (A). Representative images of PCR gels for floxed LANCL2 (B) and lysozyme cre (C) sites within *Lancl2*<sup>fl/fl</sup> LysCre<sup>+</sup>, L, and wild type, W, mice. Expression of LANCL2 in bone marrow derived macrophages in unstimulated and six hours post stimulation with *H. pylori* SS1 whole cell isolate (10ng/mL) in wild type, LANCL2<sup>-/-</sup>, and LANCL2<sup>fl/fl</sup> LysCre<sup>+</sup> cells (D). Expression of LANCL2 in whole stomach RNA in WT, LANCL2<sup>-/-</sup>, LANCL2<sup>fl/fl</sup>Cre<sup>-</sup> and LANCL2<sup>fl/fl</sup> LysCre<sup>+</sup> (E). Immunohistochemistry of wild-type and LANCL2<sup>-/-</sup> stomach with anti-LANCL2 antibody (MyBioSource, MBS154355) following five days of no treatment or treatment with LANCL2 ligand NSC61610 (F).
